# Supplementary material for: Mobilized Multipotent Hematopoietic Progenitors Promote Expansion and Survival of Allogeneic Tregs and Protect Against Graft Versus Host Disease
Source: PubMed Central journal article supplement (PMC7907505; doi:10.3389/fimmu.2020.607180), 2021-02-12
Supplement: DataSheet_1.pdf [file DataSheet_1.pdf]

**D'Aveni et al.**  
**Supplementary Figure 1**

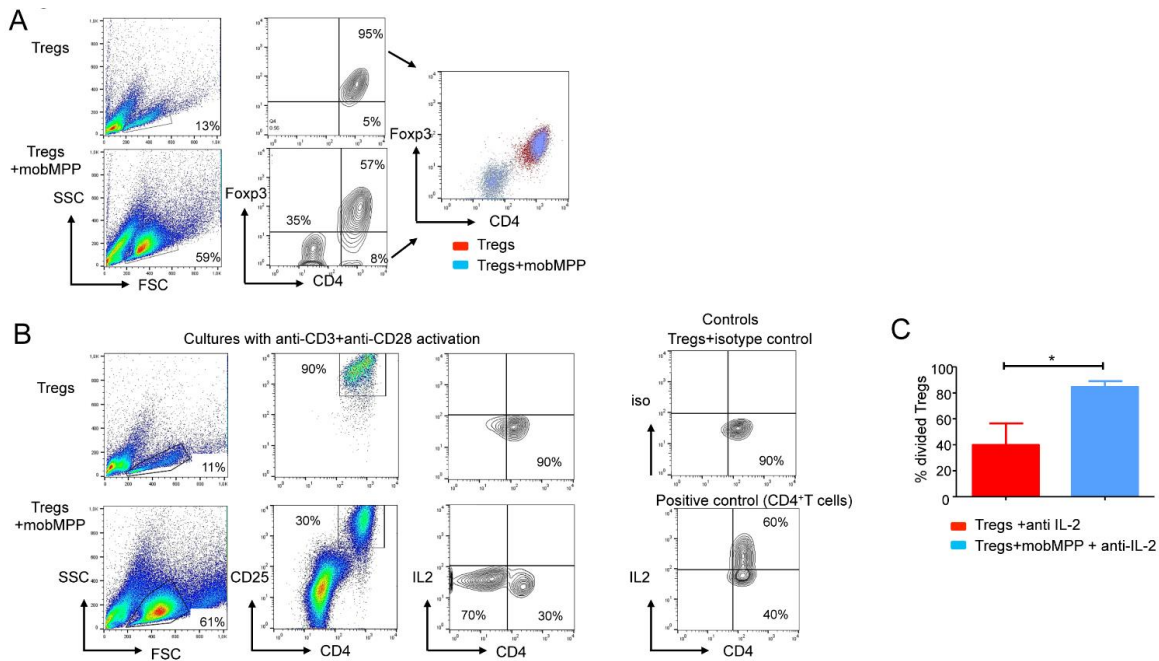

**Figure S1. Natural Tregs enhanced by mobMPP maintain their phenotype and proliferate in an IL-2 independent mechanism.**

A. B6 Treg cells activated by anti-CD3 and anti-CD28 were cultured alone or with mobMPP (1:1 ratio). After 4 days of culture, intra-nuclear Foxp3 was measured.

B. B6 Treg cells activated by anti-CD3 and anti-CD28 were cultured alone or with mobMPP (1:1 ratio). After 4 days of culture, cell surface molecules including CD4 and CD25 and intra-cytoplasmic IL-2 production were analyzed in Tregs and MobMPP. To assess intra-cellular IL-2 production, gates were based on isotype controls and positive control performed with B6 CD4<sup>+</sup>CD25<sup>+</sup> T cells activated by anti-CD3 and anti-CD28.

C. B6 Treg cells activated by anti-CD3 and anti-CD28 were cultured with IL-2 blocking antibody (red) or with mobMPP and IL-2 blocking antibody (blue), (n=3). The percentage of Tregs in proliferation ( $\geq$  division 1) is still significantly higher when Tregs are cultured with mobMPP even with blocking anti-IL-2 antibody ( $84.63 \pm 2.53\%$  vs.  $39.87 \pm 9.6\%$ , \*,  $p = 0.0107$ ). Data from 3 independent experiments (n=3) were compared using Student's unpaired t-test.
